# Supplementary material
Source: PubMed Central journal article supplement (PMC11334382)

Different amount of training data (SHHS)

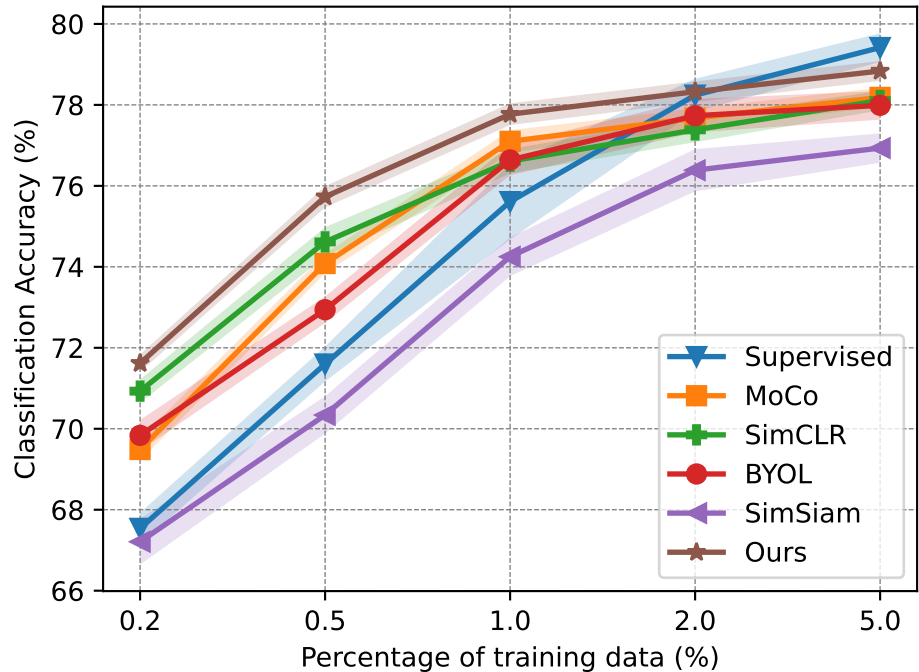

Different amount of training data (MGH)

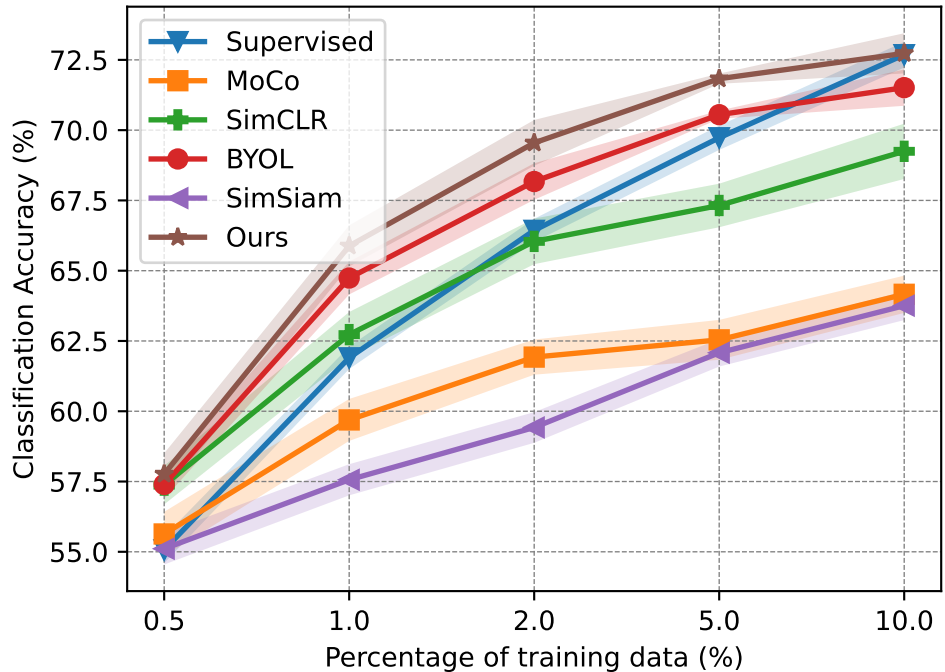

Supplement: ai_v2i1e46769_app4.pdf [file ai_v2i1e46769_app4.pdf]
